# Supplementary material for: Feasibility Study of a Network Meta-Analysis and Unanchored Population-Adjusted Indirect Treatment Comparison of Niraparib, Olaparib, and Bevacizumab as Maintenance Therapies in Patients with Newly Diagnosed Advanced Ovarian Cancer
Source: MDPI journal article supplement (doi:10.3390/cancers14051285), 2022-03-02
Supplement: s1 [file s1]

## Supplementary Materials

**Table S1: EMBASE, Medline, Medline (R) In-Process search strategy (EMBASE interface) clinical search strategy.**

| Index | Description                             | Search terms                                                                                                                                                                                                                                                                                                                                                                                                                                                                                                                                                                                                                                                                                                                                                      | Hits                                         |
|-------|-----------------------------------------|-------------------------------------------------------------------------------------------------------------------------------------------------------------------------------------------------------------------------------------------------------------------------------------------------------------------------------------------------------------------------------------------------------------------------------------------------------------------------------------------------------------------------------------------------------------------------------------------------------------------------------------------------------------------------------------------------------------------------------------------------------------------|----------------------------------------------|
| 1     | Population                              | 'ovarian cancer'/exp OR 'ovar* cancer*':ti,ab OR 'fallopian tube cancer*' OR 'fallopian tube cancer':ti,ab OR 'peritoneal cancer'/exp OR 'periton* cancer*':ti,ab OR ((ovar* OR fallopian OR 'fallopian tube*' OR periton* OR granulosa OR krukensberg* OR oviduct* OR 'uterine tube*') NEXT/3 (neoplas* OR cancer* OR tumour* OR tumor* OR carcino* OR malignan* OR adenocarcino* OR metast* OR mesothelioma*)) OR dysgerminoma* OR gynandroblastoma*                                                                                                                                                                                                                                                                                                            | Original SLR (February 13, 2019):<br>179,027 |
|       |                                         |                                                                                                                                                                                                                                                                                                                                                                                                                                                                                                                                                                                                                                                                                                                                                                   | Update (27 February 2020):<br>192,065        |
| 2     | Drug (maintenance)                      | 'PARP inhibitor'/exp OR 'PARP inhibitor*':ti,ab OR 'poly (ADP-ribose) polymerase inhibitor':ti,ab OR niraparib/exp OR niraparib:ti,ab OR zejula:ti,ab OR MK4827:ti,ab OR 'MK 4827':ti,ab OR olaparib/exp OR olaparib:ti,ab OR lypnarza:ti,ab OR 'AZD 2281':ti,ab OR AZD2281:ti,ab OR rucaparib/exp OR rucaparib:ti,ab OR veliparib/exp OR veliparib:ti,ab OR talazoparib/exp OR talazoparib:ti,ab OR pazopanib/exp OR pazopanib:ti,ab OR votrient:ti,ab OR bevacuzimab/exp OR bevacuzimab:ti,ab OR avastin:ti,ab OR altuzan:ti,ab                                                                                                                                                                                                                                 | Original SLR:<br>19,930                      |
|       |                                         |                                                                                                                                                                                                                                                                                                                                                                                                                                                                                                                                                                                                                                                                                                                                                                   | Update:<br>23,183                            |
| 3     | Study types:<br>RCT Filter <sup>1</sup> | ('clinical trial'/de OR 'randomized controlled trial'/de OR 'controlled clinical trial'/de OR 'multicenter study'/de OR 'Phase 3 clinical trial'/de OR 'Phase 4 clinical trial'/de OR 'randomization'/de OR 'single blind procedure'/de OR 'double blind procedure'/de OR 'crossover procedure'/de OR 'placebo'/de OR 'randomi*ed controlled trial*':ti,ab OR rct:ti,ab OR 'random allocation':ti,ab OR 'randomly allocated':ti,ab OR 'allocated randomly':ti,ab OR (allocated NEXT/2 random):ti,ab OR 'single blind*':ti,ab OR 'double blind*':ti,ab OR ((treble OR triple) NEXT/1 blind*):ti,ab OR placebo*:ti,ab OR 'prospective study'/de) NOT ('case study'/de OR 'case report':ti,ab OR 'abstract report'/de OR 'letter'/de OR 'editorial'/de OR 'note'/de) | Original SLR:<br>1,979,541                   |
|       |                                         |                                                                                                                                                                                                                                                                                                                                                                                                                                                                                                                                                                                                                                                                                                                                                                   | Update:<br>2,156,154                         |

|   |                                       |                                                                                                                                                                                                                                                                                                                                                                                                                                                                                                                                     |                            |
|---|---------------------------------------|-------------------------------------------------------------------------------------------------------------------------------------------------------------------------------------------------------------------------------------------------------------------------------------------------------------------------------------------------------------------------------------------------------------------------------------------------------------------------------------------------------------------------------------|----------------------------|
| 4 | Observation study filter <sup>1</sup> | 'clinical trial'/de OR 'case control study' OR 'family study'/de OR 'longitudinal study'/de OR 'retrospective study'/de OR ('prospective study'/de NOT 'randomized controlled trial'/de) OR 'cohort analysis'/de OR (cohort NEXT/1 (study OR studies)) OR (('case control' NEXT/1 (study OR studies)):ti,ab) OR (('follow up' NEXT/1 (study OR studies)):ti,ab) OR ((observational NEXT/1 (study OR studies)):ti,ab) OR ((epidemiologic* NEXT/1 (study OR studies)):ti,ab) OR (('cross sectional' NEXT/1 (study OR studies)):ti,ab) | Original SLR:<br>2,956,349 |
|   |                                       |                                                                                                                                                                                                                                                                                                                                                                                                                                                                                                                                     | Update:<br>3,284,461       |
| 5 | Combine filters and restrict date     | #1 AND #2 AND (#3 OR #4)                                                                                                                                                                                                                                                                                                                                                                                                                                                                                                            | Original SLR:<br>1,025     |
|   |                                       | #1 AND #2 AND (#3 OR #4) AND [13-2-2019]/sd NOT [27-2-2020]/sd AND [humans]/lim                                                                                                                                                                                                                                                                                                                                                                                                                                                     | Update:<br>296             |

RCT, randomized control trial; SLR, systematic literature review. <sup>1</sup> SIGN. Search filter. <https://www.sign.ac.uk/what-we-do/methodology/search-filters/> Accessed July 14.

**Table S2: CENTRAL clinical search strategy.**

| Index | Description                 | Search terms                                                                                                                                                                                                                                                                                                                                                                                                                                                                                                                                                 | Hits                    |
|-------|-----------------------------|--------------------------------------------------------------------------------------------------------------------------------------------------------------------------------------------------------------------------------------------------------------------------------------------------------------------------------------------------------------------------------------------------------------------------------------------------------------------------------------------------------------------------------------------------------------|-------------------------|
| 1     | Terms for population        | MeSH descriptor: [Ovarian Neoplasms] explode all trees or MeSH descriptor: [Fallopian Tube Neoplasms] explode all trees or MeSH descriptor: [Peritoneal Neoplasms] explode all trees or 'ovar* cancer':ti,ab or 'fallopian tube cancer':ti,ab or 'periton* cancer':ti,ab or ((ovar* or fallopian or 'fallopian tube*' or periton* or granulosa or krukenberg* or oviduct* or 'uterine tube*') next/3 (neoplas* or cancer* or tumour* or tumor* or carcino* or malignan* or adenocarcino* or metast* or mesothelioma*)) or dysgerminoma* or gynandroblastoma* | Original SLR:<br>10,518 |
|       |                             |                                                                                                                                                                                                                                                                                                                                                                                                                                                                                                                                                              | Update:<br>13,868       |
| 2     | Comparator<br>(maintenance) | 'PARP inhibitor*':ti,ab or 'poly (ADP-ribose) polymerase inhibitor':ti,ab or niraparib:ti,ab or zejula:ti,ab or MK4827:ti,ab or 'MK 4827':ti,ab or olaparib:ti,ab or lynparza:ti,ab or 'AZD 2281':ti,ab or AZD2281:ti,ab or rucaparib:ti,ab or veliparib:ti,ab or talazoparib:ti,ab or pazopanib:ti,ab or votrient:ti,ab or bevacuzimab:ti,ab or avastin:ti,ab or altuzan:ti,ab                                                                                                                                                                              | Original SLR:<br>1,073  |
|       |                             |                                                                                                                                                                                                                                                                                                                                                                                                                                                                                                                                                              | Update:<br>2,133        |
| 3     | Combine terms               | #1 and #2 in trials.                                                                                                                                                                                                                                                                                                                                                                                                                                                                                                                                         | Original SLR:<br>260    |
|       |                             |                                                                                                                                                                                                                                                                                                                                                                                                                                                                                                                                                              | Update:<br>447          |
| 4     | Restrict dates              | 13-2-2019 to 27-02-2020                                                                                                                                                                                                                                                                                                                                                                                                                                                                                                                                      | Update only:<br>167     |

MeSH, medical subject heading; PARP, poly (ADP-ribose) polymerase; SLR, systematic literature review.

**Table S3: Grey literature search strategy.**

| Source             | Interface/URL                                                                         | Search strategy and hits                                                                                                                                                                                                                                                                                                                                                  |
|--------------------|---------------------------------------------------------------------------------------|---------------------------------------------------------------------------------------------------------------------------------------------------------------------------------------------------------------------------------------------------------------------------------------------------------------------------------------------------------------------------|
| NICE               | <a href="https://www.nice.org.uk">https://www.nice.org.uk</a>                         | Original SLR (February 13, 2019): <ul style="list-style-type: none"> <li>• Ovarian cancer (36) – 0 chosen <ul style="list-style-type: none"> <li>○ Fallopian tube cancer (6) – 0 chosen</li> <li>○ Peritoneal cancer (14) – 0 chosen</li> <li>○ Olaparib (2) – 0 chosen</li> </ul> </li> <li>• Rucaparib (4) – 0 chosen</li> <li>• Bevacizumab (19) – 0 chosen</li> </ul> |
|                    |                                                                                       | Update (February 27, 2020): <ul style="list-style-type: none"> <li>• Ovarian cancer (19) – 0 chosen <ul style="list-style-type: none"> <li>○ Fallopian tube cancer (10) – 0 chosen</li> <li>○ Peritoneal cancer (12) – 0 chosen</li> <li>○ Olaparib (6) – 0 chosen</li> <li>○ Rucaparib (3) – 0 chosen</li> <li>○ Bevacizumab (8) – 0 chosen</li> </ul> </li> </ul>       |
| PBS                | <a href="http://www.pbs.gov.au/">http://www.pbs.gov.au/</a>                           | Original SLR: <ul style="list-style-type: none"> <li>• “Ovarian cancer” (36) – 0 chosen</li> <li>• “Fallopian tube cancer” (8) – 0 chosen</li> <li>• “Peritoneal cancer” (28) – 0 chosen</li> </ul>                                                                                                                                                                       |
|                    |                                                                                       | Update: <ul style="list-style-type: none"> <li>• “Ovarian cancer” (35) – 0 chosen</li> <li>• “Fallopian tube cancer” (8) – 0 chosen</li> <li>• “Peritoneal cancer” (9) – 0 chosen</li> </ul>                                                                                                                                                                              |
| CADTH              | <a href="http://www.cadth.ca">http://www.cadth.ca</a>                                 | Original SLR: <ul style="list-style-type: none"> <li>• Ovarian cancer (20) – 0 chosen</li> <li>• Fallopian tube cancer (4) – 0 chosen</li> <li>• Peritoneal cancer (12) – 0 chosen</li> </ul>                                                                                                                                                                             |
|                    |                                                                                       | Update: <ul style="list-style-type: none"> <li>• Ovarian cancer (9) – 0 chosen</li> <li>• Fallopian tube cancer (0) – 0 chosen</li> <li>• Peritoneal cancer (5) – 0 chosen</li> </ul>                                                                                                                                                                                     |
| SMC                | <a href="http://www.scottishmedicines.org.uk">http://www.scottishmedicines.org.uk</a> | Original SLR: <ul style="list-style-type: none"> <li>• Malignant disease and immunosuppression filter – (74) – 0 chosen</li> </ul>                                                                                                                                                                                                                                        |
|                    |                                                                                       | Update: <ul style="list-style-type: none"> <li>• Malignant disease and immunosuppression filter – (0) – 0 chosen</li> </ul>                                                                                                                                                                                                                                               |
| ClinicalTrials.gov | <a href="https://clinicaltrials.gov/ct2/home">https://clinicaltrials.gov/ct2/home</a> | Direct searching of this resource was not necessary as it is catalogued by the Cochrane Registry. (0 chosen)                                                                                                                                                                                                                                                              |
| ESMO               | <a href="https://www.esmo.org/">https://www.esmo.org/</a>                             | Original SLR: (“ovarian” OR “fallopian tube” OR “peritoneal”) AND “cancer” (100) – 0 chosen                                                                                                                                                                                                                                                                               |

|      |                                                                                                                                                                                                                  |                                                                                                                                                                                                                                                                                             |
|------|------------------------------------------------------------------------------------------------------------------------------------------------------------------------------------------------------------------|---------------------------------------------------------------------------------------------------------------------------------------------------------------------------------------------------------------------------------------------------------------------------------------------|
|      |                                                                                                                                                                                                                  | Update: ("ovarian" OR "fallopian tube" OR "peritoneal") AND "cancer" (40) – 1 chosen                                                                                                                                                                                                        |
| ESGO | <a href="https://www.esgo.org/">https://www.esgo.org/</a>                                                                                                                                                        | Original SLR: ESGO 2017 Vienna Congress – 0 chosen                                                                                                                                                                                                                                          |
|      |                                                                                                                                                                                                                  | Update: ESGO 2019 Athens Congress – 2 chosen                                                                                                                                                                                                                                                |
| ASCO | <a href="https://meeting.library.asco.org/">https://meeting.library.asco.org/</a>                                                                                                                                | Original SLR: (Title:"Ovarian cancer" OR Title:"Fallopian tube cancer" OR Title:"Peritoneal cancer") AND (Title:"cost" OR Title:"economic" OR Title:"utility" OR Title:"utilities" OR Title:"disutilities" OR Title:"eq-5d" OR Title:"resource")) (8) – 1 chosen                            |
|      |                                                                                                                                                                                                                  | Update: (Title:"Ovarian cancer" OR Title:"Fallopian tube cancer" OR Title:"Peritoneal cancer") AND (Title:"cost" OR Title:"economic" OR Title:"utility" OR Title:"utilities" OR Title:"disutilities" OR Title:"eq-5d" OR Title:"resource") (2) – 1 chosen                                   |
| ASGO | <a href="http://asgo2017.tokyo.umin.jp/">http://asgo2017.tokyo.umin.jp/</a><br><a href="http://www.asgo2019.org/Information/ASGO2019File/list.asp">http://www.asgo2019.org/Information/ASGO2019File/list.asp</a> | Manually search ASGO 2017 and ASGO 2019 – 0 chosen                                                                                                                                                                                                                                          |
| SGO  | <a href="http://sgo.peachnewmedia.com/store/provider/custompage.php?pageid=11">http://sgo.peachnewmedia.com/store/provider/custompage.php?pageid=11</a>                                                          | The following conferences were manually searched for any relevant information: 2019 SGO Winter Meeting, 2018 SGO Winter Meeting, SGO 2018 Annual Meeting on Women's Cancer, 2018 Allied Health Professionals Workshop: Solutions to Practice Challenges and 2017 Allied Workshop – 0 chosen |
| NCRI | <a href="http://abstracts.ncri.org.uk/">http://abstracts.ncri.org.uk/</a>                                                                                                                                        | Original SLR: <ul style="list-style-type: none"> <li>• Ovarian cancer (60) – 0 chosen</li> <li>• Fallopian tube cancer (3) – 0 chosen</li> <li>• Peritoneal cancer (11) – 0 chosen</li> </ul>                                                                                               |
|      |                                                                                                                                                                                                                  | Update:                                                                                                                                                                                                                                                                                     |

|                |                                                                                                                                                     |                                                                                                                                                                                                                   |
|----------------|-----------------------------------------------------------------------------------------------------------------------------------------------------|-------------------------------------------------------------------------------------------------------------------------------------------------------------------------------------------------------------------|
|                |                                                                                                                                                     | <ul style="list-style-type: none"> <li>• Ovarian cancer (19) – 0 chosen</li> <li>• Fallopian tube cancer (0) – 0 chosen</li> <li>• Peritoneal cancer (3) – 0 chosen</li> </ul>                                    |
| EACR           | <a href="https://www.eacr.org/search/">https://www.eacr.org/search/</a>                                                                             | Original SLR: <ul style="list-style-type: none"> <li>• Ovarian cancer (8) – 0 chosen</li> <li>• Fallopian tube cancer (0) – 0 chosen</li> <li>• Peritoneal cancer (0) – 0 chosen</li> </ul>                       |
|                |                                                                                                                                                     | Update: <ul style="list-style-type: none"> <li>• Ovarian cancer (1) – 0 chosen</li> <li>• Fallopian tube cancer (0) – 0 chosen</li> <li>• Peritoneal cancer (0) – 0 chosen</li> </ul>                             |
| ISPOR          | <a href="https://www.ispor.org/heor-resources/presentations-database/search">https://www.ispor.org/heor-resources/presentations-database/search</a> | Original SLR: <ul style="list-style-type: none"> <li>• Ovarian cancer (68) – 0 chosen</li> <li>• Fallopian tube cancer (3) – 0 chosen</li> <li>• Peritoneal cancer (4) – 0 chosen</li> </ul>                      |
|                |                                                                                                                                                     | Update: <ul style="list-style-type: none"> <li>• Ovarian cancer (19) – 0 chosen</li> <li>• Fallopian tube cancer (0) – 0 chosen</li> <li>• Peritoneal cancer (0) – 0 chosen</li> </ul>                            |
| Google Scholar | <a href="https://scholar.google.com/">https://scholar.google.com/</a>                                                                               | Original SLR:<br>allintitle: ("ovarian cancer" OR "fallopian tube cancer" OR "peritoneal cancer") AND (((("trial" OR "study") AND ("randomised" OR "randomized")) OR "rct" OR "observational")<br>(56) – 5 chosen |
|                |                                                                                                                                                     | Update:<br>allintitle: ("ovarian cancer" OR "fallopian tube cancer" OR "peritoneal cancer") AND (((("trial" OR "study") AND ("randomised" OR "randomized")) OR "rct" OR "observational")<br>(21) – 2 chosen       |

ASCO, American Society of Clinical Oncology; ASGO, Asian Society of Gynecologic Oncology; CADTH, Canadian Agency for Drugs and Technologies in Health; EACR, European Association for Cancer Research; ESGO, European Society of Gynecological Oncology; ESMO, European Society for Medical Oncology; ISPOR, Professional Society for Health Economics and Outcomes Research; NCRI, National Cancer Research Institute; NICE, National Institute for Health and Care Excellence; PBS, Pharmaceutical Benefits Scheme; RCT, randomized control trial; SGO, Society of Gynecological Oncology; SLR, systematic literature review; SMC, Scottish Medicines Consortium.
